# Supplementary material
Source: PubMed Central journal article supplement (PMC4138060)
Supplement: NIHMS524486-supplement-Supplemental_Table_1.pdf [file NIHMS524486-supplement-Supplemental_Table_1.pdf]

Supplemental Table 1.

| <b>GPCR name</b>                                         | <b>Abbreviation</b>                                                        | <b>Ligand</b>               |
|----------------------------------------------------------|----------------------------------------------------------------------------|-----------------------------|
| Cysteinyl leukotriene receptor 1                         | CYSLTR1                                                                    | Leukotriene C 4, LTD4, LTE4 |
| Leukotriene B4 receptor 1                                | LTB4R1                                                                     | Leukotriene B 4             |
| Leukotriene B4 receptor 2                                | LTB4R2                                                                     | Leukotriene B 4             |
| Prostaglandin D receptor                                 | PTGDR (DP1)                                                                | Prostaglandin D 2           |
| Platelet activating factor receptor                      | PTAFR                                                                      | PAF                         |
| Serotonin receptors (7 families,<br>5-HT3 is not a GPCR) | 5-HT1B<br>5-HT1D<br>5-HT1F<br>5-HT2A<br>5-HT2B<br>5-HT5A<br>5-HT6<br>5-HT7 | Serotonin                   |

List of GPCRs made by human BMSCs that might respond to MC mediators
